# Supplementary material for: Role of Oxidative Stress and Inflammatory Cytokines (TNF-α and IL-6) in Acetic Acid-Induced Ulcerative Colitis in Rats: Ameliorated by Otostegia fruticosa
Source: MDPI journal article supplement (doi:10.3390/life11030195), 2021-03-03
Supplement: s1 [file s1]

**Table S1:** Scoring of the disease activity index.

| Weight loss (%) | Stool consistency     | Occult/gross bleeding | Score |
|-----------------|-----------------------|-----------------------|-------|
| Normal          | Normal                | Normal                | 0     |
| 1-5             | Soft but still formed |                       | 1     |
| 5-10            | Loose stools          | Hemo-occult positive  | 2     |
| 10-20           | Diarrhea              |                       | 3     |
| >20             |                       | Gross bleeding        | 4     |

Note. Normal stools = well-formed pellets, loose stools = pasty and semi-formed stools which do not stick to the anus and diarrhea = liquid stools that stick to the anus.
